# Supplementary material for: LC-ESI/QTOF-MS Profiling of Chicory and Lucerne Polyphenols and Their Antioxidant Activities
Source: MDPI journal article supplement (doi:10.3390/antiox10060932), 2021-06-08
Supplement: s1 [file s1]

# LC-ESI/QTOF-MS Profiling of Chicory and Lucerne Polyphenols and Their Antioxidant Activities

Yasir Iqbal<sup>1</sup>, Eric N. Ponnampalam<sup>2</sup>, Hafiz A.R. Suleria<sup>1</sup>, Jeremy J. Cottrell<sup>1</sup> and Frank R. Dunshea<sup>1,3\*</sup>

<sup>1</sup> School of Agriculture and Food, Faculty of Veterinary and Agricultural Sciences, The University of Melbourne, Parkville, VIC 3010, Australia; yasir.iqbal@student.unimelb.edu.au (Y.I.); hafiz.suleria@unimelb.edu.au (H.A.R.S.); jcottrell@unimelb.edu.au (J.J.C.)

<sup>2</sup> Animal Production Sciences, Agriculture Victoria Research, Department of Jobs, Precincts and Regions, Bundoora, VIC 3083, Australia; Eric.Ponnampalam@agriculture.vic.gov.au

<sup>3</sup> Faculty of Biological Sciences, The University of Leeds, Leeds LS2 9JT, UK

\* Correspondence: fdunshea@unimelb.edu.au

**Abstract:** Chicory and lucerne are used as specialised forages in sheep or dairy production systems in some parts of the world. Recently, these plants are gaining attention as raw materials in the search for natural antioxidants for use in animal feeds, human foods and nutraceutical formulations. The antioxidant potential of these plants is credited to polyphenols, a subgroup of phytochemicals. Therefore, phenolic characterisation is an essential step before their use as ingredients in animal feeds, human food or nutraceutical preparations. In this study, we performed qualitative and quantitative analysis of polyphenols in chicory and lucerne. Profiling of polyphenols from chicory and lucerne was performed by LC-ESI/QTOF-MS with a total of 80 phenolic compounds identified in chicory and lucerne. The quantification of polyphenols was achieved by high performance liquid chromatography, coupled with a photo diode array (HPLC-PDA). Chicoric acid was the major phenolic acid found in chicory, with the highest concentration ( $1692.33 \pm 0.04$   $\mu\text{g/g}$  DW) among all the polyphenols quantified in this study. 2-hydroxybenzoic acid was the major phenolic acid found in lucerne, with the highest concentration of  $1440.64 \pm 0.04$   $\mu\text{g/g}$  DW. Total phenolic, flavonoids and total tannin contents were measured, and the antioxidant potential was determined by 2,2-Diphenyl-1-picrylhydrazyl, Ferric Reducing Antioxidant Power, 2,2-Azino-bis-3-ethylbenzothiazoline-6-sulfonic Acid, Hydroxyl ( $\text{OH}^\cdot$ ) Radical Scavenging Activity, Chelating Ability of Ferrous Ion ( $\text{Fe}^{+2}$ ) and Reducing Power (RPA) assays. Both chicory ( $8.04 \pm 0.33$  mg AAE/g DW) and lucerne ( $11.29 \pm 0.25$  mg AAE/g DW) showed high values for Hydroxyl ( $\text{OH}^\cdot$ ) Radical Scavenging Activity. The current study allowed us to draw a profile of polyphenols from chicory and lucerne. They provided a molecular fingerprint useful for the application of these plant materials in human foods, animal feeds and pharmaceutical formulations.

**Keywords:** chicory; lucerne; polyphenols; extraction; antioxidants; LC-ESI/QTOF-MS; HPLC-PDA

---

**Table (1S).** Phenolic compounds detected and tentatively characterised in chicory by LC-ESI-QTOF/MS in both positive and negative ionisation mode

| No.                                 | Proposed compounds                                | Molecular Formula                               | RT (min) | Mode of Ionization         | Molecular Weight | Theoretical ( <i>m/z</i> ) | Observed ( <i>m/z</i> ) | Mass Error (ppm) | Samples |
|-------------------------------------|---------------------------------------------------|-------------------------------------------------|----------|----------------------------|------------------|----------------------------|-------------------------|------------------|---------|
| <b>Phenolic acids</b>               |                                                   |                                                 |          |                            |                  |                            |                         |                  |         |
| <b>Hydroxybenzoic acids</b>         |                                                   |                                                 |          |                            |                  |                            |                         |                  |         |
| 1                                   | 4-Hydroxybenzoic acid 4-O-glucoside               | C <sub>13</sub> H <sub>16</sub> O <sub>8</sub>  | 29.7     | ESI + / [M+H] <sup>+</sup> | 300.085          | 301.0918                   | 301.093                 | 5.31             | Chicory |
| 2                                   | Gallic acid 4-O-glucoside                         | C <sub>13</sub> H <sub>16</sub> O <sub>10</sub> | 45.61    | ESI - / [M-H] <sup>-</sup> | 332.074          | 331.0670                   | 331.065                 | -5.44            | Chicory |
| 3                                   | Ellagic acid glucoside                            | C <sub>20</sub> H <sub>16</sub> O <sub>13</sub> | 50.4     | ESI - / [M-H] <sup>-</sup> | 464.059          | 463.0518                   | 463.055                 | 6.05             | Chicory |
| <b>Hydroxycinnamic acids</b>        |                                                   |                                                 |          |                            |                  |                            |                         |                  |         |
| 4                                   | Cinnamic acid                                     | C <sub>9</sub> H <sub>8</sub> O <sub>2</sub>    | 12.43    | ESI + / [M+H] <sup>+</sup> | 148.052          | 149.0597                   | 149.059                 | -8.05            | Chicory |
| 5                                   | 3-Caffeoylquinic acid                             | C <sub>16</sub> H <sub>18</sub> O <sub>9</sub>  | 24.78    | ESI + / [M+H] <sup>+</sup> | 354.095          | 355.1024                   | 355.1                   | -7.04            | Chicory |
| 6                                   | Chicoric acid                                     | C <sub>22</sub> H <sub>18</sub> O <sub>12</sub> | 82.6     | ESI - / [M-H] <sup>-</sup> | 474.08           | 473.0725                   | 473.076                 | 8.24             | Chicory |
| <b>Hydroxyphenylpropanoic acids</b> |                                                   |                                                 |          |                            |                  |                            |                         |                  |         |
| 7                                   | Dihydrocaffeic acid 3-O-glucuronide               | C <sub>15</sub> H <sub>18</sub> O <sub>10</sub> | 28.51    | ESI - / [M-H] <sup>-</sup> | 358.09           | 357.0827                   | 357.085                 | 5.60             | Chicory |
| <b>Flavonoids</b>                   |                                                   |                                                 |          |                            |                  |                            |                         |                  |         |
| <b>Anthocyanins</b>                 |                                                   |                                                 |          |                            |                  |                            |                         |                  |         |
| 8                                   | Cyanidin 3-O-(6''-malonyl-3''-glucosyl-glucoside) | C <sub>30</sub> H <sub>33</sub> O <sub>19</sub> | 28.51    | ESI - / [M-H] <sup>-</sup> | 697.162          | 696.1543                   | 696.152                 | -3.88            | Chicory |
| 9                                   | Petunidin 3-O-(6''-p-coumaroyl-glucoside)         | C <sub>31</sub> H <sub>29</sub> O <sub>14</sub> | 49.43    | ESI + / [M+H] <sup>+</sup> | 625.156          | 626.1630                   | 626.166                 | 4.79             | Chicory |
| 10                                  | Delphinidin 3-O-feruloyl-glucoside                | C <sub>31</sub> H <sub>29</sub> O <sub>15</sub> | 51.96    | ESI - / [M-H] <sup>-</sup> | 641.151          | 640.1433                   | 640.145                 | 2.66             | Chicory |
| <b>Dihydrochalcones</b>             |                                                   |                                                 |          |                            |                  |                            |                         |                  |         |
| 11                                  | Dihydromyricetin 3-O-rhamnoside                   | C <sub>21</sub> H <sub>22</sub> O <sub>12</sub> | 84.18    | ESI - / [M-H] <sup>-</sup> | 466.111          | 465.1038                   | 465.104                 | 0.65             | Chicory |
| <b>Flavanols</b>                    |                                                   |                                                 |          |                            |                  |                            |                         |                  |         |
| 12                                  | (-)-Epigallocatechin 3'-O-glucuronide             | C <sub>21</sub> H <sub>22</sub> O <sub>13</sub> | 66.32    | ESI - / [M-H] <sup>-</sup> | 482.106          | 481.0987                   | 481.101                 | 4.16             | Chicory |
| 13                                  | 3'-O-Methyl(-)-epicatechin 7-O-glucuronide        | C <sub>22</sub> H <sub>24</sub> O <sub>12</sub> | 75.38    | ESI - / [M-H] <sup>-</sup> | 480.127          | 479.1195                   | 479.121                 | 3.97             | Chicory |
| <b>Flavanones</b>                   |                                                   |                                                 |          |                            |                  |                            |                         |                  |         |
| 14                                  | Hesperetin 3'-O-glucuronide                       | C <sub>22</sub> H <sub>22</sub> O <sub>12</sub> | 74.52    | ESI - / [M-H] <sup>-</sup> | 478.111          | 477.1038                   | 477.107                 | 6.71             | Chicory |
| <b>Flavones</b>                     |                                                   |                                                 |          |                            |                  |                            |                         |                  |         |
| 15                                  | Chrysoeriol 7-O-glucoside                         | C <sub>22</sub> H <sub>22</sub> O <sub>11</sub> | 46.73    | ESI + / [M+H] <sup>+</sup> | 462.116          | 463.1235                   | 463.123                 | -0.86            | Chicory |
| 16                                  | Apigenin 6-C-glucoside                            | C <sub>21</sub> H <sub>20</sub> O <sub>10</sub> | 74.52    | ESI - / [M-H] <sup>-</sup> | 432.1056         | 431.0983                   | 431.0979                | -0.93            | Chicory |

|                          |                                                        |                                                 |       |                            |         |          |         |       |         |
|--------------------------|--------------------------------------------------------|-------------------------------------------------|-------|----------------------------|---------|----------|---------|-------|---------|
| <b>Flavonols</b>         |                                                        |                                                 |       |                            |         |          |         |       |         |
| 17                       | Kaempferol 3-O-(6''-acetyl-galactoside) 7-O-rhamnoside | C <sub>29</sub> H <sub>32</sub> O <sub>16</sub> | 24.68 | ESI + / [M+H] <sup>+</sup> | 636.169 | 637.1763 | 637.178 | 2.20  | Chicory |
| 18                       | 3-Methoxysinensetin                                    | C <sub>21</sub> H <sub>22</sub> O <sub>8</sub>  | 26.7  | ESI + / [M+H] <sup>+</sup> | 402.132 | 403.1388 | 403.137 | -5.21 | Chicory |
| 19                       | Isorhamnetin                                           | C <sub>16</sub> H <sub>12</sub> O <sub>7</sub>  | 29.72 | ESI + / [M+H] <sup>+</sup> | 316.058 | 317.0656 | 317.067 | 3.15  | Chicory |
| 20                       | Quercetin 3-O-glucosyl-xyloside                        | C <sub>26</sub> H <sub>28</sub> O <sub>16</sub> | 47.8  | ESI - / [M-H] <sup>-</sup> | 596.138 | 595.1304 | 595.129 | -3.02 | Chicory |
| 21                       | Isorhamnetin 3-O-glucoside 7-O-rhamnoside              | C <sub>28</sub> H <sub>32</sub> O <sub>16</sub> | 49.59 | ESI + / [M+H] <sup>+</sup> | 624.169 | 625.1763 | 625.176 | -0.48 | Chicory |
| 22                       | Myricetin 3-O-arabinoside                              | C <sub>20</sub> H <sub>18</sub> O <sub>12</sub> | 50.27 | ESI - / [M-H] <sup>-</sup> | 450.08  | 449.0725 | 449.076 | 7.13  | Chicory |
| 23                       | Isorhamnetin 3-O-glucuronide                           | C <sub>22</sub> H <sub>20</sub> O <sub>13</sub> | 55.35 | ESI - / [M-H] <sup>-</sup> | 492.09  | 491.0831 | 491.086 | 5.09  | Chicory |
| <b>Isoflavonoids</b>     |                                                        |                                                 |       |                            |         |          |         |       |         |
| 24                       | 6''-O-Acetylglycitin                                   | C <sub>24</sub> H <sub>24</sub> O <sub>11</sub> | 7.838 | ESI - / [M-H] <sup>-</sup> | 488.132 | 487.1246 | 487.123 | -2.87 | Chicory |
| 25                       | Dihydrobiochanin A                                     | C <sub>16</sub> H <sub>14</sub> O <sub>5</sub>  | 20.59 | ESI - / [M-H] <sup>-</sup> | 286.084 | 285.0768 | 285.076 | -3.51 | Chicory |
| <b>Lignans</b>           |                                                        |                                                 |       |                            |         |          |         |       |         |
| 26                       | 1-Acetoxypinoresinol                                   | C <sub>22</sub> H <sub>24</sub> O <sub>8</sub>  | 45.2  | ESI - / [M-H] <sup>-</sup> | 416.147 | 415.1398 | 415.139 | -2.17 | Chicory |
| <b>Stilbenes</b>         |                                                        |                                                 |       |                            |         |          |         |       |         |
| 27                       | Piceatannol                                            | C <sub>14</sub> H <sub>12</sub> O <sub>4</sub>  | 7.44  | ESI + / [M+H] <sup>+</sup> | 244.074 | 245.0809 | 245.082 | 4.90  | Chicory |
| <b>Other polyphenols</b> |                                                        |                                                 |       |                            |         |          |         |       |         |
| <b>Tyrosols</b>          |                                                        |                                                 |       |                            |         |          |         |       |         |
| 28                       | Oleuropein-aglycone                                    | C <sub>19</sub> H <sub>22</sub> O <sub>8</sub>  | 7.954 | ESI - / [M-H] <sup>-</sup> | 378.132 | 377.1242 | 377.124 | -1.06 | Chicory |
| <b>Other polyphenols</b> |                                                        |                                                 |       |                            |         |          |         |       |         |
| 29                       | Lithospermic acid                                      | C <sub>27</sub> H <sub>22</sub> O <sub>12</sub> | 24.62 | ESI + / [M+H] <sup>+</sup> | 538.111 | 539.1184 | 539.123 | 7.61  | Chicory |

Table (2S). Phenolic compounds detected and tentatively characterised in lucerne by LC-ESI-QTOF/MS in both positive and negative ionisation mode

| No.                                 | Proposed compounds                       | Molecular Formula                                                | RT (min) | Mode of Ionization         | Molecular Weight | Theoretical (m/z) | Observed (m/z) | Mass Error (ppm) | Samples |
|-------------------------------------|------------------------------------------|------------------------------------------------------------------|----------|----------------------------|------------------|-------------------|----------------|------------------|---------|
| <b>Phenolic acids</b>               |                                          |                                                                  |          |                            |                  |                   |                |                  |         |
| <b>Hydroxybenzoic acids</b>         |                                          |                                                                  |          |                            |                  |                   |                |                  |         |
| 1                                   | 2,3-Dihydroxybenzoic acid                | C <sub>7</sub> H <sub>6</sub> O <sub>4</sub>                     | 12.217   | ESI + / [M+H] <sup>+</sup> | 154.0266         | 155.0339          | 155.0336       | -1.94            | Lucerne |
| 2                                   | 2-Hydroxybenzoic acid                    | C <sub>7</sub> H <sub>6</sub> O <sub>3</sub>                     | 13.724   | ESI + / [M+H] <sup>+</sup> | 138.0317         | 139.0390          | 139.0389       | -0.72            | Lucerne |
| <b>Hydroxycinnamic acids</b>        |                                          |                                                                  |          |                            |                  |                   |                |                  |         |
| 3                                   | m-Coumaric acid                          | C <sub>9</sub> H <sub>8</sub> O <sub>3</sub>                     | 7.811    | ESI + / [M+H] <sup>+</sup> | 164.0473         | 165.0546          | 165.0548       | 1.21             | Lucerne |
| 4                                   | 2-S-Glutathionyl caftaric acid           | C <sub>23</sub> H <sub>27</sub> N <sub>3</sub> O <sub>15</sub> S | 13.954   | ESI - / [M-H] <sup>-</sup> | 617.1163         | 616.1090          | 616.1062       | -4.54            | Lucerne |
| 5                                   | 3-Sinapoylquinic acid                    | C <sub>18</sub> H <sub>22</sub> O <sub>10</sub>                  | 18.196   | ESI + / [M+H] <sup>+</sup> | 398.1213         | 399.1286          | 399.1288       | 0.50             | Lucerne |
| 6                                   | Chicoric acid                            | C <sub>22</sub> H <sub>18</sub> O <sub>12</sub>                  | 29.063   | ESI - / [M-H] <sup>-</sup> | 474.0798         | 473.0725          | 473.0696       | -6.13            | Lucerne |
| 7                                   | 1,5-Dicaffeoylquinic acid                | C <sub>25</sub> H <sub>24</sub> O <sub>12</sub>                  | 68.797   | ESI + / [M+H] <sup>+</sup> | 516.1268         | 517.1341          | 517.1319       | -4.25            | Lucerne |
| <b>Hydroxyphenylpropanoic acids</b> |                                          |                                                                  |          |                            |                  |                   |                |                  |         |
| 8                                   | Dihydrocaffeic acid 3-O-glucuronide      | C <sub>15</sub> H <sub>18</sub> O <sub>10</sub>                  | 9.001    | ESI - / [M-H] <sup>-</sup> | 358.09           | 357.0827          | 357.0819       | -2.24            | Lucerne |
| 9                                   | Dihydroferulic acid 4-sulfate            | C <sub>10</sub> H <sub>12</sub> O <sub>7</sub> S                 | 35.54    | ESI - / [M-H] <sup>-</sup> | 276.0304         | 275.0231          | 275.0218       | -4.73            | Lucerne |
| <b>Flavonoids</b>                   |                                          |                                                                  |          |                            |                  |                   |                |                  |         |
| <b>Anthocyanins</b>                 |                                          |                                                                  |          |                            |                  |                   |                |                  |         |
| 10                                  | Peonidin                                 | C <sub>16</sub> H <sub>13</sub> O <sub>6</sub>                   | 24.126   | ESI - / [M-H] <sup>-</sup> | 301.0712         | 300.0639          | 300.0654       | 5.00             | Lucerne |
| 11                                  | Delphinidin 3-O-feruloyl-glucoside       | C <sub>31</sub> H <sub>29</sub> O <sub>15</sub>                  | 36.849   | ESI - / [M-H] <sup>-</sup> | 641.1506         | 640.1433          | 640.1413       | -3.12            | Lucerne |
| 12                                  | Pelargonidin 3-O-glucosyl-rutinoside     | C <sub>33</sub> H <sub>41</sub> O <sub>19</sub>                  | 79.658   | ESI - / [M-H] <sup>-</sup> | 741.2242         | 740.2169          | 740.2187       | 2.43             | Lucerne |
| <b>Dihydrochalcones</b>             |                                          |                                                                  |          |                            |                  |                   |                |                  |         |
| 13                                  | Dihydromyricetin 3-O-rhamnoside          | C <sub>21</sub> H <sub>22</sub> O <sub>12</sub>                  | 21.177   | ESI + / [M+H] <sup>+</sup> | 466.1111         | 467.1184          | 467.1162       | -4.71            | Lucerne |
| <b>Flavanols</b>                    |                                          |                                                                  |          |                            |                  |                   |                |                  |         |
| 14                                  | 4'-O-Methylepigallocatechin              | C <sub>16</sub> H <sub>16</sub> O <sub>7</sub>                   | 8.142    | ESI + / [M+H] <sup>+</sup> | 320.0896         | 321.0969          | 321.0986       | 5.29             | Lucerne |
| 15                                  | 4''-O-Methylepigallocatechin 3-O-gallate | C <sub>23</sub> H <sub>20</sub> O <sub>11</sub>                  | 19.124   | ESI + / [M+H] <sup>+</sup> | 472.1006         | 473.1079          | 473.1049       | -6.34            | Lucerne |
| <b>Flavanones</b>                   |                                          |                                                                  |          |                            |                  |                   |                |                  |         |
| 16                                  | Narirutin                                | C <sub>27</sub> H <sub>32</sub> O <sub>14</sub>                  | 12.463   | ESI - / [M-H] <sup>-</sup> | 580.1792         | 579.1719          | 579.1719       | 0.00             | Lucerne |
| 17                                  | Neerocitrin                              | C <sub>27</sub> H <sub>32</sub> O <sub>15</sub>                  | 15.645   | ESI + / [M+H] <sup>+</sup> | 596.1741         | 597.1814          | 597.1853       | 6.53             | Lucerne |
| 18                                  | Hesperetin 3',7-O-diglucuronide          | C <sub>28</sub> H <sub>30</sub> O <sub>18</sub>                  | 17.136   | ESI + / [M+H] <sup>+</sup> | 654.1432         | 655.1505          | 655.1523       | 2.75             | Lucerne |
| 19                                  | Naringenin 7-O-glucoside                 | C <sub>21</sub> H <sub>22</sub> O <sub>10</sub>                  | 60.018   | ESI + / [M+H] <sup>+</sup> | 434.1213         | 435.1286          | 435.1266       | -4.60            | Lucerne |
| <b>Flavones</b>                     |                                          |                                                                  |          |                            |                  |                   |                |                  |         |
| 20                                  | Luteolin 7-O-diglucuronide               | C <sub>27</sub> H <sub>26</sub> O <sub>18</sub>                  | 20.714   | ESI + / [M+H] <sup>+</sup> | 638.1119         | 639.1192          | 639.1192       | 0.00             | Lucerne |
| 21                                  | 6-Hydroxyluteolin 7-O-rhamnoside         | C <sub>21</sub> H <sub>20</sub> O <sub>11</sub>                  | 40.689   | ESI + / [M+H] <sup>+</sup> | 448.1006         | 449.1079          | 449.1073       | -1.34            | Lucerne |

|                      |                                                                          |                                                  |        |                            |          |          |          |       |         |
|----------------------|--------------------------------------------------------------------------|--------------------------------------------------|--------|----------------------------|----------|----------|----------|-------|---------|
| 22                   | Apigenin 6-C-glucoside                                                   | C <sub>21</sub> H <sub>20</sub> O <sub>10</sub>  | 41.948 | ESI + / [M+H] <sup>+</sup> | 432.1056 | 433.1129 | 433.1126 | -0.69 | Lucerne |
| 23                   | Apigenin 7-O-glucuronide                                                 | C <sub>21</sub> H <sub>18</sub> O <sub>11</sub>  | 43.107 | ESI + / [M+H] <sup>+</sup> | 446.0849 | 447.0922 | 447.0925 | 0.67  | Lucerne |
| 24                   | Chrysoeriol 7-O-(6''-malonyl-glucoside)                                  | C <sub>25</sub> H <sub>24</sub> O <sub>14</sub>  | 60.201 | ESI + / [M+H] <sup>+</sup> | 548.1166 | 549.1239 | 549.1236 | -0.55 | Lucerne |
| 25                   | 7,4'-Dihydroxyflavone                                                    | C <sub>15</sub> H <sub>10</sub> O <sub>4</sub>   | 62.139 | ESI + / [M+H] <sup>+</sup> | 254.0579 | 255.0652 | 255.0647 | -1.96 | Lucerne |
| <b>Flavonols</b>     |                                                                          |                                                  |        |                            |          |          |          |       |         |
| 26                   | Myricetin 3-O-rutinoside                                                 | C <sub>27</sub> H <sub>30</sub> O <sub>17</sub>  | 8.454  | ESI - / [M-H] <sup>-</sup> | 626.1483 | 625.1410 | 625.1404 | -0.96 | Lucerne |
| 27                   | Spinacetin 3-O-glucosyl-(1->6)-[apiosyl(1->2)]-glucoside                 | C <sub>34</sub> H <sub>42</sub> O <sub>22</sub>  | 32.757 | ESI - / [M-H] <sup>-</sup> | 802.2168 | 801.2095 | 801.2084 | -1.37 | Lucerne |
| 28                   | 5,4'-Dihydroxy-3,3'-dimethoxy-6:7-methylenedioxyflavone 4'-O-glucuronide | C <sub>24</sub> H <sub>22</sub> O <sub>14</sub>  | 42.498 | ESI - / [M-H] <sup>-</sup> | 534.101  | 533.0937 | 533.0928 | -1.69 | Lucerne |
| 29                   | 3,7-Dimethylquercetin                                                    | C <sub>17</sub> H <sub>14</sub> O <sub>7</sub>   | 44.73  | ESI + / [M+H] <sup>+</sup> | 330.074  | 331.0813 | 331.0812 | -0.30 | Lucerne |
| <b>Isoflavonoids</b> |                                                                          |                                                  |        |                            |          |          |          |       |         |
| 30                   | 3',4',5,7-Tetrahydroxyisoflavanone                                       | C <sub>15</sub> H <sub>12</sub> O <sub>6</sub>   | 19.124 | ESI + / [M+H] <sup>+</sup> | 288.0634 | 289.0707 | 289.0704 | -1.04 | Lucerne |
| 31                   | 3'-Hydroxygenistein                                                      | C <sub>15</sub> H <sub>10</sub> O <sub>6</sub>   | 20.034 | ESI - / [M-H] <sup>-</sup> | 286.0477 | 285.0404 | 285.042  | 5.61  | Lucerne |
| 32                   | Puerarin                                                                 | C <sub>21</sub> H <sub>20</sub> O <sub>9</sub>   | 24.341 | ESI + / [M+H] <sup>+</sup> | 416.1107 | 417.1180 | 417.1195 | 3.60  | Lucerne |
| 33                   | Daidzein 4'-O-glucuronide                                                | C <sub>21</sub> H <sub>18</sub> O <sub>10</sub>  | 24.556 | ESI + / [M+H] <sup>+</sup> | 430.09   | 431.0973 | 431.0968 | -1.16 | Lucerne |
| 34                   | Genistein 4',7-O-diglucuronide                                           | C <sub>27</sub> H <sub>26</sub> O <sub>17</sub>  | 25.186 | ESI + / [M+H] <sup>+</sup> | 622.117  | 623.1243 | 623.1238 | -0.80 | Lucerne |
| 35                   | Irisolidone 7-O-glucuronide                                              | C <sub>23</sub> H <sub>22</sub> O <sub>12</sub>  | 26.345 | ESI + / [M+H] <sup>+</sup> | 490.1111 | 491.1184 | 491.1189 | 1.02  | Lucerne |
| 36                   | Tectorigenin 7-sulfate                                                   | C <sub>16</sub> H <sub>12</sub> O <sub>9</sub> S | 31.332 | ESI - / [M-H] <sup>-</sup> | 380.0202 | 379.0129 | 379.0147 | 4.75  | Lucerne |
| 37                   | 6''-O-Malonyldaidzin                                                     | C <sub>24</sub> H <sub>22</sub> O <sub>12</sub>  | 35.872 | ESI - / [M-H] <sup>-</sup> | 502.1111 | 501.1038 | 501.1035 | -0.60 | Lucerne |
| 38                   | 6''-O-Malonylgenistin                                                    | C <sub>24</sub> H <sub>22</sub> O <sub>13</sub>  | 58.677 | ESI + / [M+H] <sup>+</sup> | 518.106  | 519.1133 | 519.115  | 3.27  | Lucerne |
| 39                   | 2-Dehydro-O-desmethylangolensin                                          | C <sub>15</sub> H <sub>12</sub> O <sub>4</sub>   | 61.691 | ESI + / [M+H] <sup>+</sup> | 256.0736 | 257.0809 | 257.0801 | -3.11 | Lucerne |
| 40                   | 2',7-Dihydroxy-4',5'-dimethoxyisoflavone                                 | C <sub>17</sub> H <sub>14</sub> O <sub>6</sub>   | 64.06  | ESI + / [M+H] <sup>+</sup> | 314.079  | 315.0863 | 315.0855 | -2.54 | Lucerne |
| 41                   | 2'-Hydroxyformononetin                                                   | C <sub>16</sub> H <sub>12</sub> O <sub>5</sub>   | 67.008 | ESI + / [M+H] <sup>+</sup> | 284.0685 | 285.0758 | 285.075  | -2.81 | Lucerne |
| 42                   | 3',4',7-Trihydroxyisoflavanone                                           | C <sub>15</sub> H <sub>12</sub> O <sub>5</sub>   | 81.004 | ESI + / [M+H] <sup>+</sup> | 272.0685 | 273.0758 | 273.0746 | -4.39 | Lucerne |
| 43                   | 6''-O-Malonylglycitin                                                    | C <sub>25</sub> H <sub>24</sub> O <sub>13</sub>  | 82.926 | ESI + / [M+H] <sup>+</sup> | 532.1217 | 533.1290 | 533.1301 | 2.06  | Lucerne |
| 44                   | 3'-Hydroxydaidzein                                                       | C <sub>15</sub> H <sub>10</sub> O <sub>5</sub>   | 83.472 | ESI + / [M+H] <sup>+</sup> | 270.0528 | 271.0601 | 271.0594 | -2.58 | Lucerne |
| 45                   | 3'-Hydroxymelanettin                                                     | C <sub>16</sub> H <sub>12</sub> O <sub>6</sub>   | 84.251 | ESI + / [M+H] <sup>+</sup> | 300.0634 | 301.0707 | 301.0699 | -2.66 | Lucerne |
| 46                   | Dalbergin                                                                | C <sub>16</sub> H <sub>12</sub> O <sub>4</sub>   | 87.066 | ESI + / [M+H] <sup>+</sup> | 268.0736 | 269.0809 | 269.0788 | -7.80 | Lucerne |
| <b>Lignans</b>       |                                                                          |                                                  |        |                            |          |          |          |       |         |
| 47                   | Sesamin                                                                  | C <sub>20</sub> H <sub>18</sub> O <sub>6</sub>   | 22.138 | ESI + / [M+H] <sup>+</sup> | 354.1103 | 355.1176 | 355.1171 | -1.41 | Lucerne |
| 48                   | Trachelogenin                                                            | C <sub>21</sub> H <sub>24</sub> O <sub>7</sub>   | 35.093 | ESI - / [M-H] <sup>-</sup> | 388.1522 | 387.1449 | 387.1457 | 2.07  | Lucerne |

|                             |                         |                                                 |        |                            |          |          |          |       |         |
|-----------------------------|-------------------------|-------------------------------------------------|--------|----------------------------|----------|----------|----------|-------|---------|
| <b>Other polyphenols</b>    |                         |                                                 |        |                            |          |          |          |       |         |
| <b>Alkylphenols</b>         |                         |                                                 |        |                            |          |          |          |       |         |
| 49                          | 4-Vinylphenol           | C <sub>8</sub> H <sub>8</sub> O                 | 7.894  | ESI + / [M+H] <sup>+</sup> | 120.0575 | 121.0648 | 121.0638 | -8.26 | Lucerne |
| <b>Hydroxybenzaldehydes</b> |                         |                                                 |        |                            |          |          |          |       |         |
| 50                          | 4-Hydroxybenzaldehyde   | C <sub>7</sub> H <sub>6</sub> O <sub>2</sub>    | 31.761 | ESI + / [M+H] <sup>+</sup> | 122.0368 | 123.0441 | 123.044  | -0.81 | Lucerne |
| <b>Tyrosols</b>             |                         |                                                 |        |                            |          |          |          |       |         |
| 51                          | 3,4-DHPEA-AC            | C <sub>10</sub> H <sub>12</sub> O <sub>4</sub>  | 20.796 | ESI + / [M+H] <sup>+</sup> | 196.0736 | 197.0809 | 197.0809 | 0.00  | Lucerne |
| 52                          | Oleoside 11-methylester | C <sub>17</sub> H <sub>24</sub> O <sub>11</sub> | 64.317 | ESI - / [M-H] <sup>-</sup> | 404.1319 | 403.1246 | 403.1266 | 4.96  | Lucerne |
| 53                          | 3,4-DHPEA-EDA           | C <sub>17</sub> H <sub>20</sub> O <sub>6</sub>  | 67.034 | ESI - / [M-H] <sup>-</sup> | 320.126  | 319.1187 | 319.1179 | -2.51 | Lucerne |
| <b>Other polyphenols</b>    |                         |                                                 |        |                            |          |          |          |       |         |
| 54                          | Salvianolic acid D      | C <sub>11</sub> H <sub>10</sub> O <sub>6</sub>  | 6.085  | ESI - / [M-H] <sup>-</sup> | 238.0477 | 237.0404 | 237.0408 | 1.69  | Lucerne |
| 55                          | Salvianolic acid C      | C <sub>26</sub> H <sub>20</sub> O <sub>10</sub> | 21.26  | ESI - / [M-H] <sup>-</sup> | 492.1056 | 491.0983 | 491.1007 | 4.89  | Lucerne |
| 56                          | Coumestrol              | C <sub>15</sub> H <sub>8</sub> O <sub>5</sub>   | 83.986 | ESI + / [M+H] <sup>+</sup> | 268.0372 | 269.0445 | 269.0437 | -2.97 | Lucerne |

(a)

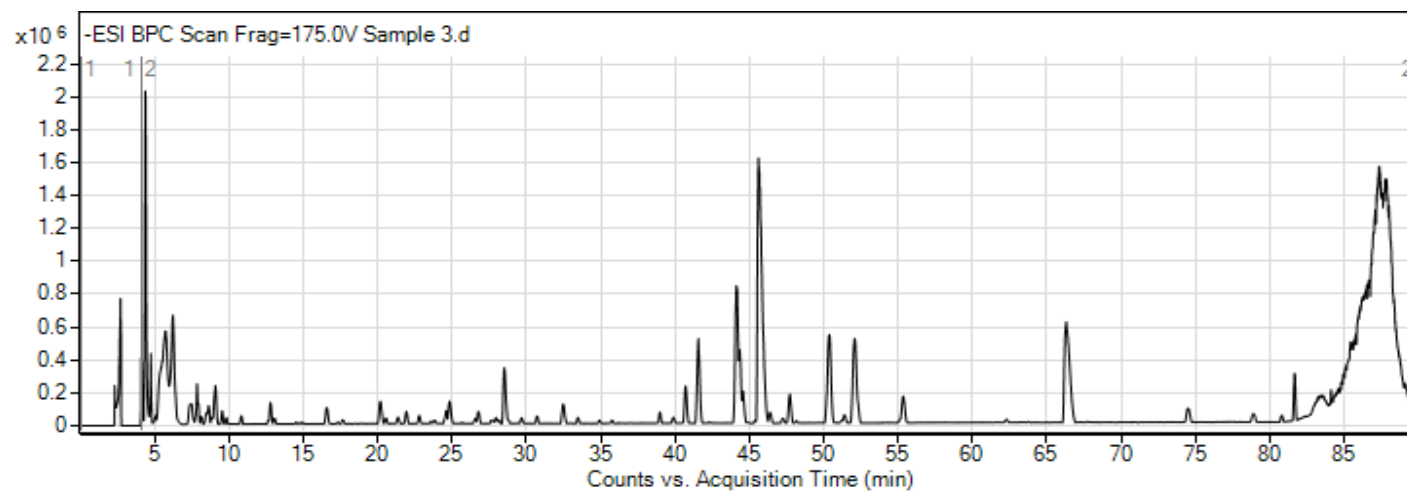

(b)

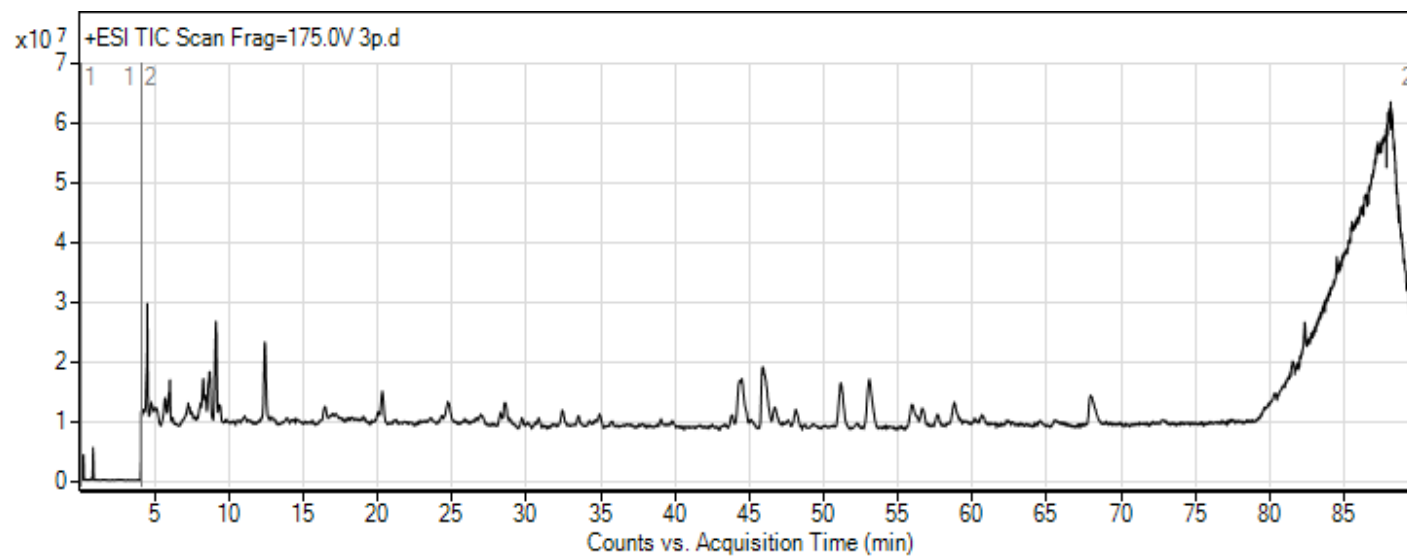

(c)

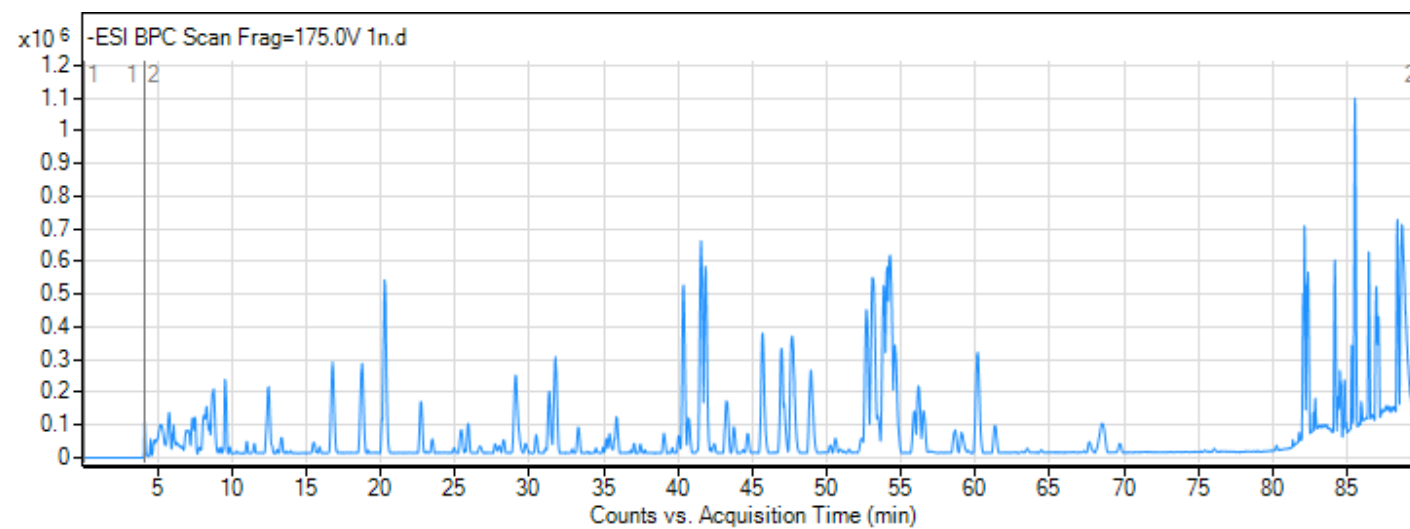

(d)

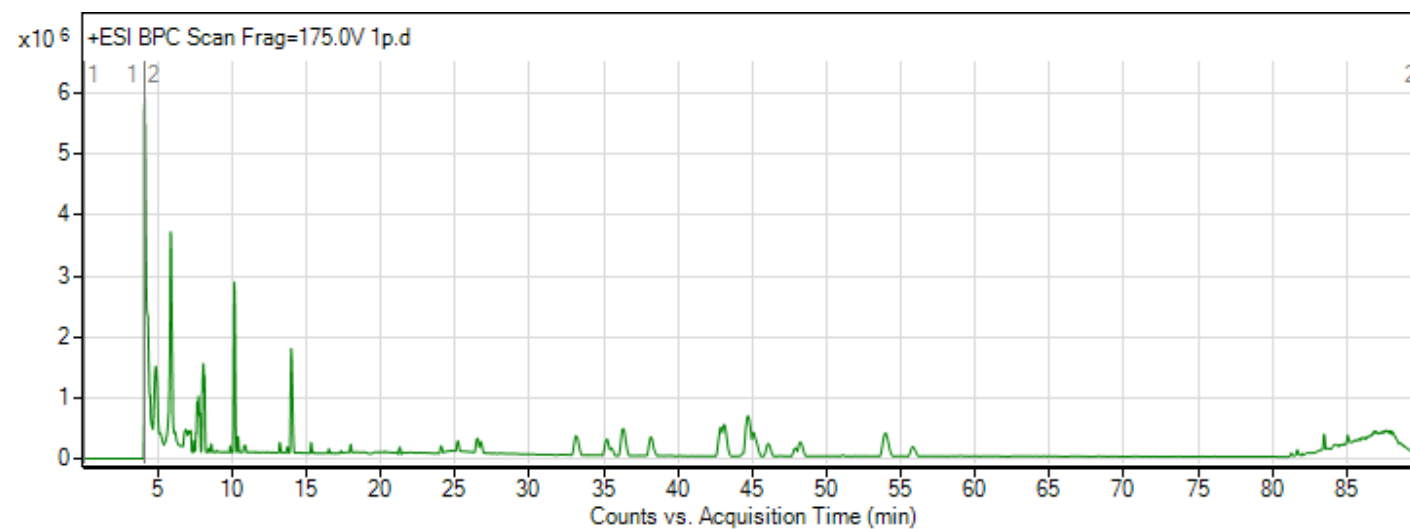



(e)

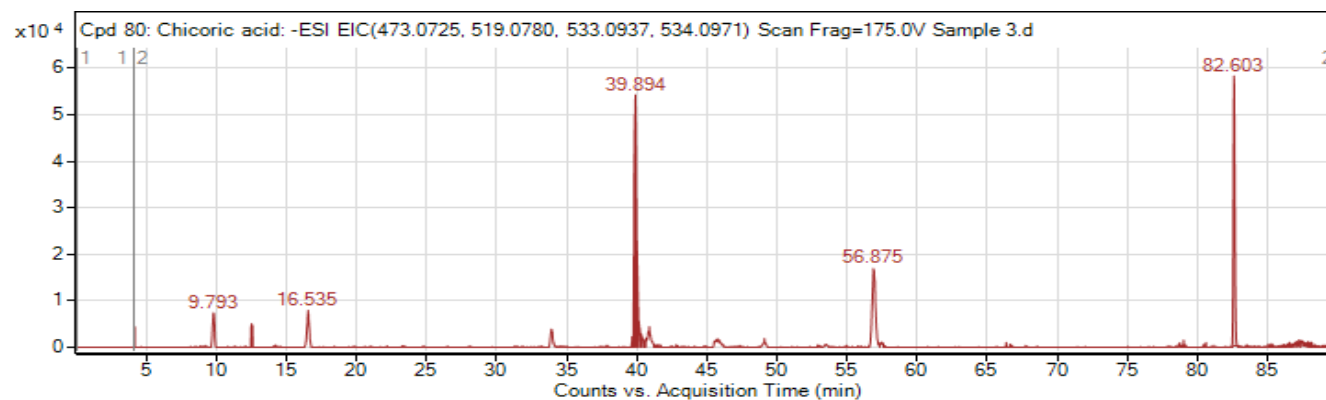

(f)

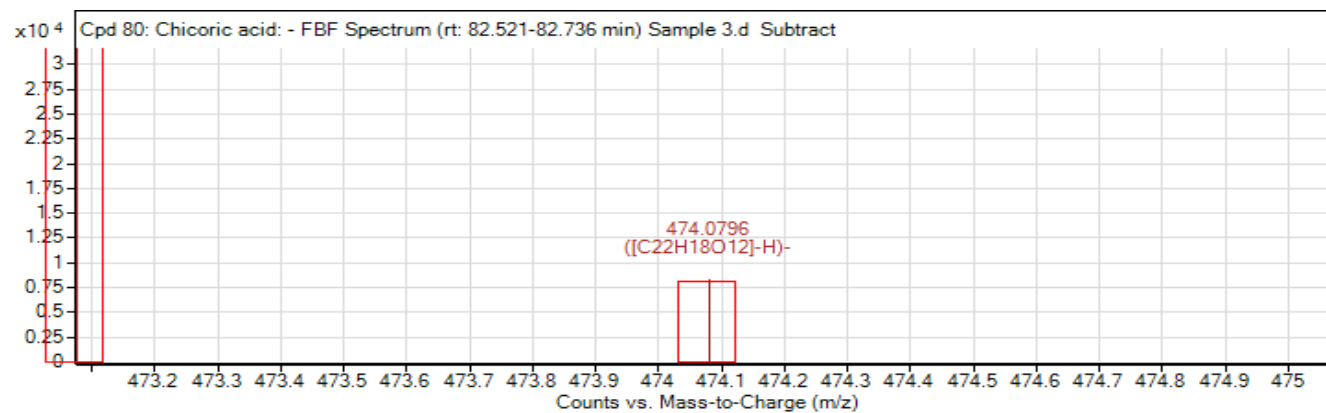

**Figure (1S): LC-ESI-QTOF/MS basic peak chromatographs (BPC) for characterisation of phenolic compounds of chicory and lucerne;** (a) Base Peak Chromatogram (BPC) of chicory in negative ionisation mode; (b) TIC of chicory in positive ionisation mode; (c) BPC of lucerne in negative ionisation mode; (d) BPC of lucerne in positive ionisation mode; (e) A chromatograph of chicoric acid (Compound 12 Chicory, Table 3), Retention time (RT = 82.603) in the negative mode of ionisation (ESI-/[M-H]<sup>-</sup>); (f) Mass spectra of chicoric acid showing  $m/z$  value 474.0796.
